# Supplementary material for: Effect of silk sericin on assembly of hydroxyapatite nanocrystals into enamel prism-like structure
Source: Royal Society of Chemistry journal article supplement (doi:10.1039/b901620a), 2009-01-01
Supplement: b901620a.pdf [file b901620a.pdf]

## Supplemental materials

The control of HA was prepared in the absence of SS. Briefly, 250 mL  $\text{Na}_2\text{HPO}_4$  aqueous solution (12 mM) was added drop-wisely into 250 mL  $\text{CaCl}_2$  (20 mM) aqueous solution at a speed of  $10 \text{ mL min}^{-1}$ , and the pH value was kept at 9.5 by NaOH aqueous solution. Then, the mixture was aged at  $25^\circ\text{C}$  for another 24 h. The obtained precipitate was washed centrifugally with distilled water, followed by vacuum-drying for 24 h at  $60^\circ\text{C}$ . Obtained product was named as cHA.

Morphology of cHA was investigated using TEM. The sample was dispersed in the distilled water under an ultrasonic treatment, which was then dropped onto the carbon-coated copper grids for the TEM observation using a transmission electron microscope (TEM) (JEM-1230, JEOL) at 80 kV. Result showed that cHA was granular and had a length of 50-100nm and a width of about 30 nm.

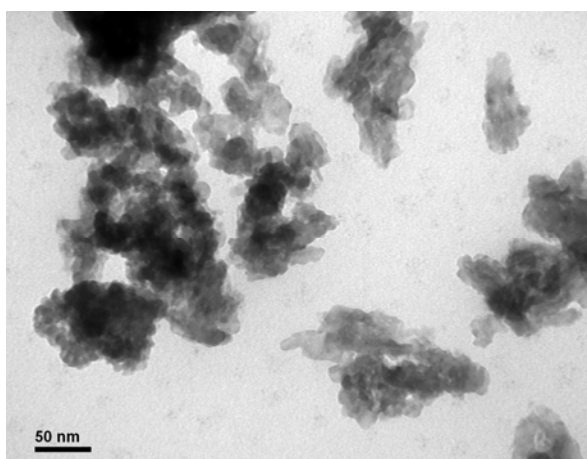

Fig. 1 TEM image of cHA
